# Supplementary material
Source: publisher site journal article supplement (https://www.dovepress.com/article/119490)
Supplement: Supplementary file 1 [file get_supplementary_file.php]

## ProAcor Centers

| Name of physician / hospital         | City      |
|--------------------------------------|-----------|
| Dr. Kurek, Christian                 | Cottbus   |
| Carl-Thiem-Klinikum Cottbus gGmbH    | Cottbus   |
| Sana-HZ Merseburg; Basedow Klinik    | Merseburg |
| Dr. Schäfer, Steffen                 | Querfurt  |
| Dr. Rybak, Karin                     | Dessau    |
| Herzzentrum Coswig                   | Coswig    |
| MVZ am Kuchwald GmbH                 | Chemnitz  |
| Dr. Kleinertz, Klaus                 | Chemnitz  |
| Dr. Nowzohour, Djafar                | Berlin    |
| Dr. Merke, Nicolas                   | Berlin    |
| Sana Klinikum Berlin Lichtenberg     | Berlin    |
| Dr. Heim, Jürgen                     | Berlin    |
| Dr. Pospiech, Rainer                 | Berlin    |
| Dr. Boitz, Martin                    | Berlin    |
| Dr. Levenson, Benny                  | Berlin    |
| HKL am Sankt Gertrauden Krankenh     | Berlin    |
| Dr. Glöckner, Dietlind               | Berlin    |
| Dr. Roeder, Sabine                   | Berlin    |
| VIVANTES Klinikum Neukölln           | Berlin    |
| Dr. Mayerheim, Sony                  | Berlin    |
| Dr. Strauß, Franz Xaver              | Berlin    |
| VIVANTES Klinikum Berlin-Hellersdo   | Berlin    |
| Maria Heimsuchung                    | Berlin    |
| Dr. Krimnitz, Jörg                   | Berlin    |
| Dr. Nestke                           | Berlin    |
| Dr. Schulze, Uwe                     | Berlin    |
| Dr. Bott, Jochen                     | Berlin    |
| Dr. Stratmann, Michael               | Berlin    |
| Vivantes Humboldt-Klinikum           | Berlin    |
| VIVANTES Klinikum Spandau            | Berlin    |
| Dr. Bensch, Ricarda                  | Berlin    |
| Dr. Glaß, Jochen                     | Berlin    |
| HELIOS Hanseklinikum Stralsund Gr    | Stralsund |
| Dr. Mitusch, Rolf                    | Stralsund |
| KH Buchholz HKL                      | Buchholz  |
| Dr. Backhaus, Susanne                | Buchholz  |
| Cardiologicum                        | Hamburg   |
| Dr. Schmidt, Ekkehard                | Hamburg   |
| Dr. Alexander, Hermann Johannes      | Kiel      |
| Städtisches Krankenhaus Kiel GmbH    | Kiel      |
| Ev. Luth. Diakonissenanstalt Flensbu | Flensburg |
| Dr. Hinrichsen, Martin               | Flensburg |
| Dr. Müller, Walter                   | Flensburg |
| Ambulantes Herzzentrum Kassel        | Kassel    |
| Dr. Utech, Andreas                   | Kassel    |
| Herz- und Gefäßzentrum am Kranke     | Göttingen |

|                                     |            |
|-------------------------------------|------------|
| Prof. Dr. Dahm, Johannes            | Göttingen  |
| St. Ansgar-Krankenhaus Höxter       | Höxter     |
| Dr. Buerschaper, Martin             | Höxter     |
| Dr. Spanier, Constanze              | Magdeburg  |
| Dr. Hofmeister, Annett              | Magdeburg  |
| Klinikum Magdeburg gGmbH            | Magdeburg  |
| Dr. Horowitz, Avner                 | Düsseldorf |
| Universitätsklinikum Düsseldorf     | Düsseldorf |
| Dr. Perings, Stefan                 | Düsseldorf |
| Dr. Raff, Franziska                 | Düsseldorf |
| Dr. Oikonomopoulos, Thomas          | Hilden     |
| Klinikum Lünen- St Marien Hospital  | Lünen      |
| Dr. Schütz, Bernd                   | Lünen      |
| Dr. Sicken, Wolfgang                | Lünen      |
| Marien-Hospital Wesel               | Wesel      |
| Dr. Wirtz, Jost Henner              | Dinslaken  |
| Dr. Gysan, Detlef                   | Köln       |
| KH Porz am Rhein gGmbH              | Köln       |
| St. Marien-Hospital Bonn            | Bonn       |
| Dr. Marschner, Jürgen               | Bonn       |
| Dreifaltigkeits-Hospital gem. GmbH  | Lippstadt  |
| Dr. Atri, Seyed Mohammad            | Lippstadt  |
| Kardiocentrum Frankfurt             | Frankfurt  |
| Dr. Geiss, Ernst                    | Frankfurt  |
| HKL am Main-Taunus-Klinikum         | Bad Soden  |
| Dr. Giokoglu, Kiriakos              | Bad Soden  |
| Kreiskrankenhaus Lörrach            | Lörrach    |
| Dr. Gekeler, Helmut                 | Lörrach    |
| MVZ am Diako                        | Augsburg   |
| Dr. Seidel, Norbert                 | Augsburg   |
| Herzklinik Ulm                      | Ulm        |
| Dr. Haerer, Winfried                | Ulm        |
| Universitätsklinikum Regensburg, Kl | Regensburg |
| Dr. Laschinger-Oestreicher          | Regensburg |
| Klinikum Coburg                     | Coburg     |
| Dr. Keller, Helmut                  | Coburg     |
| Dr. Lindner, Karl-Heinz             | Coburg     |
| Dr. Sinß, Dirk                      | Coburg     |
| Juliuspital Würzburg                | Würzburg   |
| Dr. Camerer, Martin                 | Würzburg   |
| Dr. Strömer, Hinrik                 | Würzburg   |
| Dr. Zwerenz, Ludwig                 | Würzburg   |
| Dr. Günthert, Claus                 | Höchberg   |
| Mieseler, Wilhelm-Josef             | Höchberg   |
| Dr. Dobler, Michael                 | Karlstadt  |
| Ilm-Kreis-Klinken Arnstadt-Ilmenau  | Arnstadt   |
| Dr. Böhm, Gerhard                   | Arnstadt   |
| Südharz-Krankenhaus Nordhausen g    | Nordhausen |
| Dr. Heinrich, Ullus                 | Nordhausen |
